# Supplementary material for: Synthesis and application of mixed-spinel magnesioferrite: structural, vibrational, magnetic, and electrochemical sensing properties
Source: Royal Society of Chemistry journal article supplement (doi:10.1039/d2qm00628f), 2022-10-18
Supplement: d2qm00628f1.pdf [file d2qm00628f1.pdf]

**Supplementary Information**

**Synthesis and Application of Mixed-Spinel Magnesioferrite: Structural,  
Vibrational, Magnetic, and Electrochemical Sensing Properties**

<sup>1</sup>Aneeta Manjari Padhan, <sup>1</sup>P. Mary Rajaitha, <sup>2</sup>Sanjib Nayak, <sup>1</sup>Sugato Hajra, <sup>1</sup>Manisha Sahu,  
<sup>3,4</sup>Zvonko Jagličič, <sup>5,6</sup>Primož Koželj, <sup>1,7\*</sup>Hoe Joon Kim

<sup>1</sup>Department of Robotics and Mechatronics Engineering, Daegu Gyeongbuk Institute of Science and Technology (DGIST), Daegu-42988, Republic of Korea

<sup>2</sup>Department of Physics, Indian Institute of Technology-Madras, Tamilnadu-600036, India

<sup>3</sup>Faculty of Civil and Geodetic Engineering, University of Ljubljana, Jamova 2, SI-1000 Ljubljana, Slovenia

<sup>4</sup>Institute of Mathematics, Physics and Mechanics, Jadranska 19, SI-1000 Ljubljana, Slovenia

<sup>5</sup>Jožef Stefan Institute, Jamova 39, SI-1000 Ljubljana, Slovenia

<sup>6</sup>Faculty of Mathematics and Physics, University of Ljubljana, Jadranska 19, SI-1000 Ljubljana, Slovenia

<sup>7</sup>Robotics and Mechatronics Research Center, Daegu Gyeongbuk Institute of Science and Technology (DGIST), Daegu-42988, Republic of Korea

**#Corresponding Author: Dr. Hoe Joon Kim: [joonkim@dgist.ac.kr](mailto:joonkim@dgist.ac.kr)**

## Supplementary Information

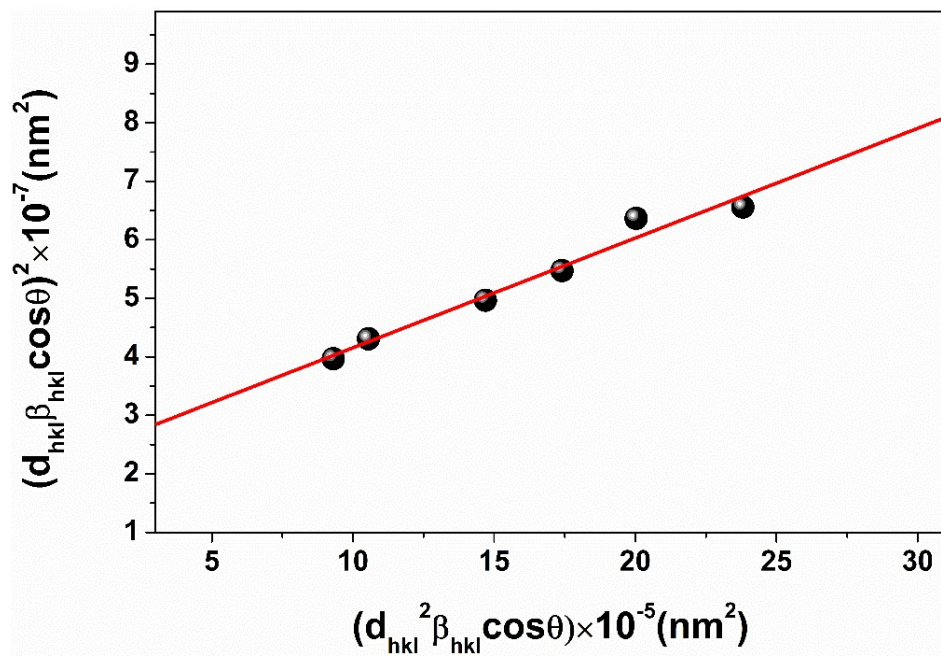

**Figure S1:** Size-strain plot for  $\text{MgFe}_2\text{O}_4$  samples. Particle size and micro-strain are deduced from the slope and the square root of the y-axis intercept of the linearly fitted data points

Supplementary Information

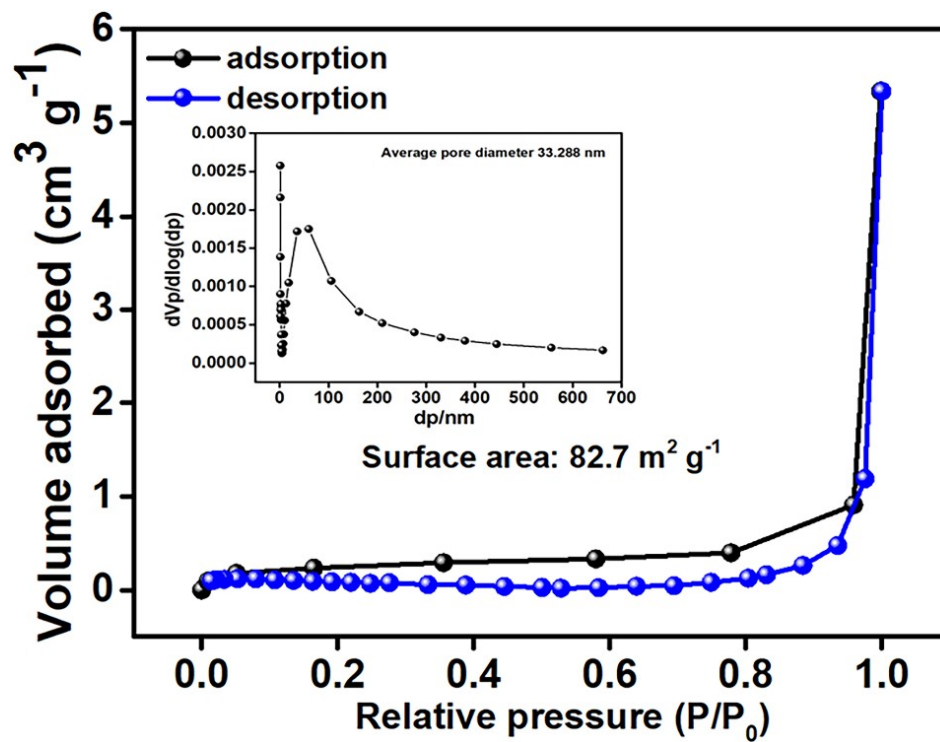

**Figure S2:** Nitrogen adsorption-desorption isotherm and average pore size distribution curve (inset) of MgFe<sub>2</sub>O<sub>4</sub> particles.

Supplementary Information

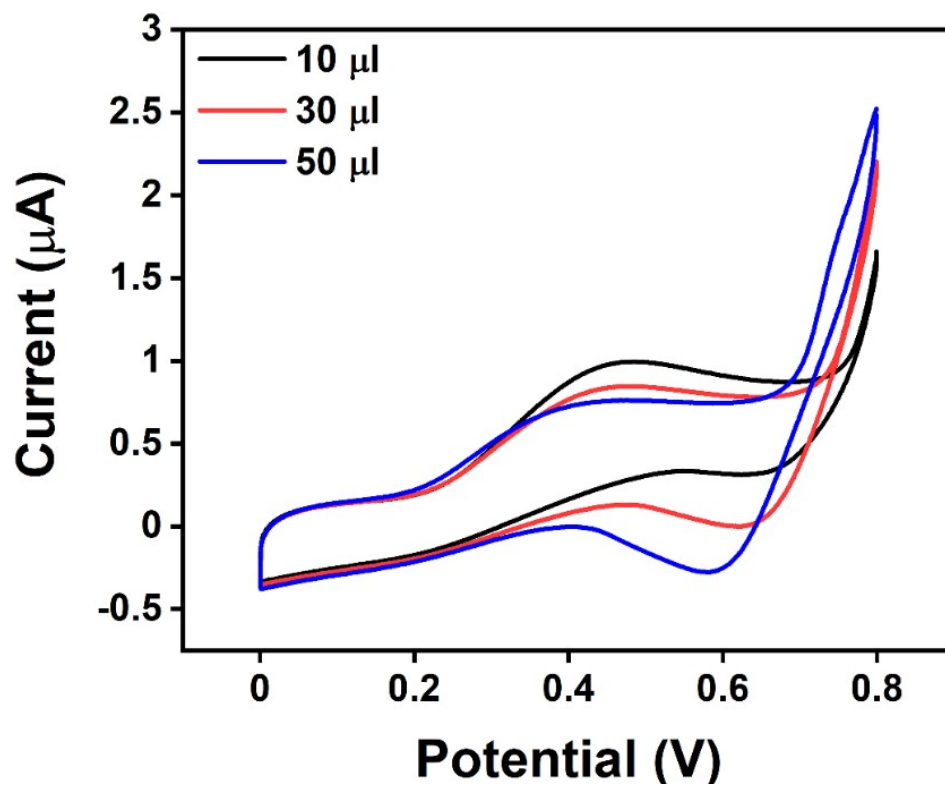

**Figure S3:** Cyclic voltammetric curves with various concentrations (10, 30, 50μl) of MgFe<sub>2</sub>O<sub>4</sub> modified GCE at 0.1 M PBS buffer (pH 7.4) at a scan rate of 50 mV s<sup>-1</sup>.

## Supplementary Information

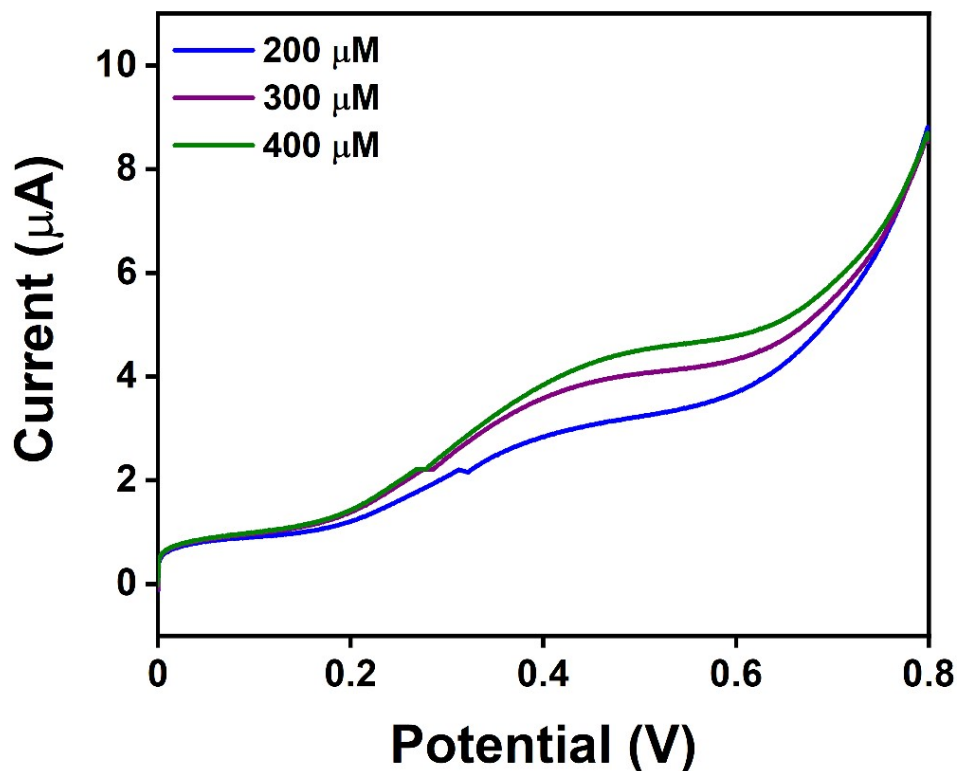

**Figure S4:** LSV response obtained for MgFe<sub>2</sub>O<sub>4</sub> modified GCE in a real sample (orange juice) with the addition of 200, 300, and 400 μM of nitrobenzene at a scan rate of 50 mV s<sup>-1</sup>.

**Table S1:** Analytical performance of MgFe<sub>2</sub>O<sub>4</sub> modified GCE in real samples

| Real Sample  | Addition (μM) | Detection (μM) | Recovery (%) |
|--------------|---------------|----------------|--------------|
| Orange juice | 200           | 6.9            | 3.45         |
|              | 300           | 9.29           | 3.09         |
|              | 400           | 10.33          | 2.58         |
